# Supplementary material for: RNA Interference-Based Therapy for Spinocerebellar Ataxia Type 7 Retinal Degeneration
Source: PubMed Central journal article supplement (PMC3997397; doi:10.1371/journal.pone.0095362), 2014-04-23

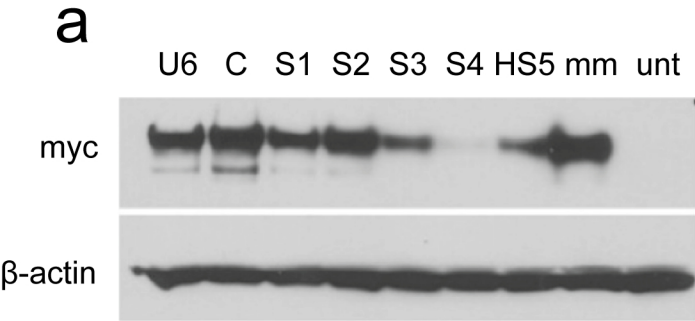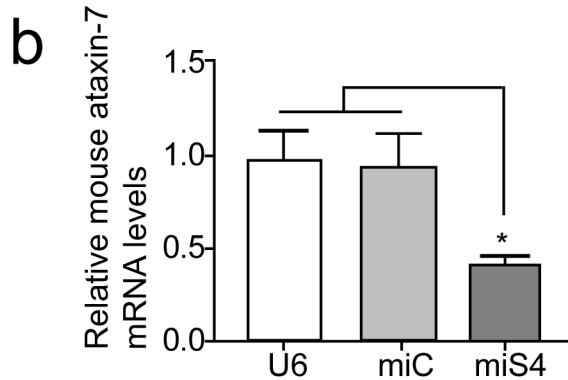

Supplement: pone.0095362.s001.pdf [file pone.0095362.s001.pdf]
